# Supplementary material
Source: Springer Nature journal article supplement (https://www.springermedizin.de/resource/supplementary/12902_2014_265_MOESM5_ESM.pdf/9515908)

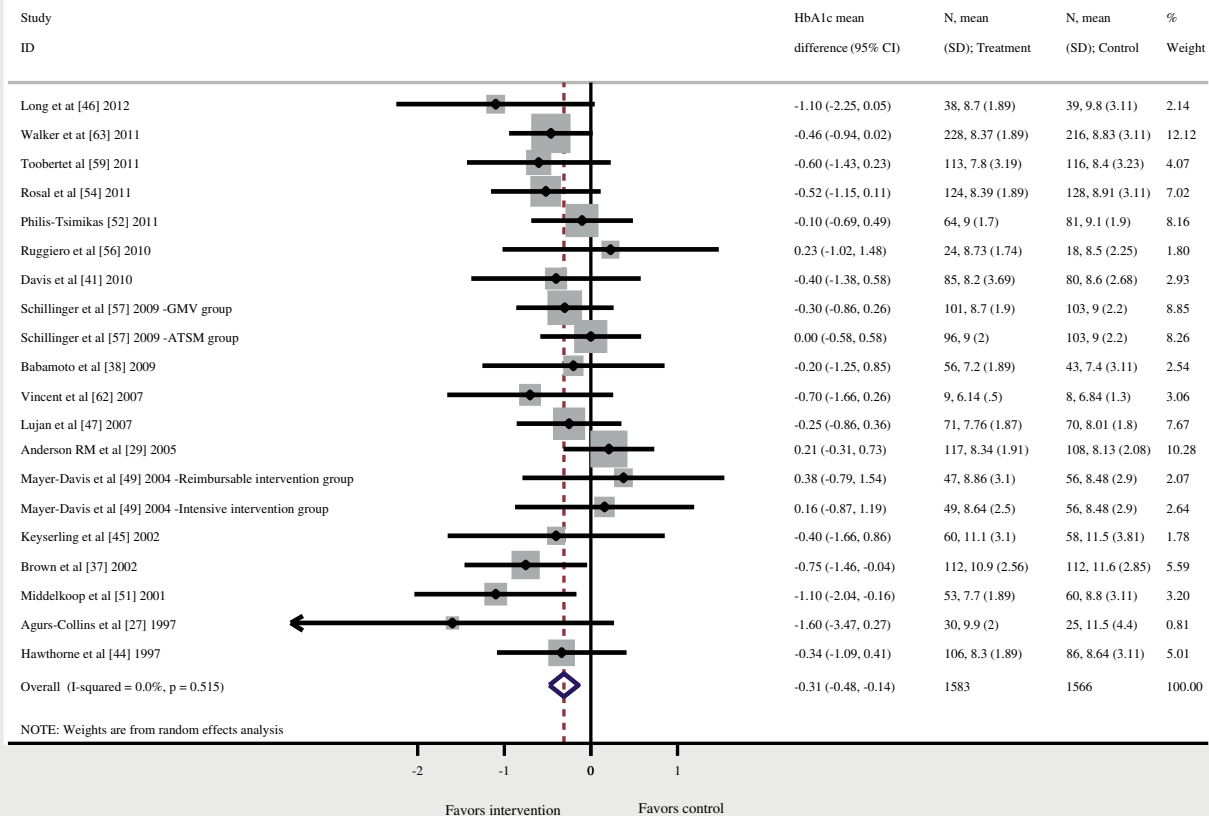

Supplement: MOESM5 [file 9515908]
